# Supplementary material for: Enhanced photo-degradation of bisphenol a under simulated solar light irradiation by Zn–Ti mixed metal oxides loaded on graphene from aqueous media
Source: Royal Society of Chemistry journal article supplement (doi:10.1039/c6ra01089j), 2016-01-01
Supplement: c6ra01089j1.pdf [file c6ra01089j1.pdf]

## **Supporting Information for**

**Enhanced photo-degradation of bisphenol A under simulated solar  
light irradiation by Zn-Ti mixed metal oxides loaded on graphene  
from aqueous media**

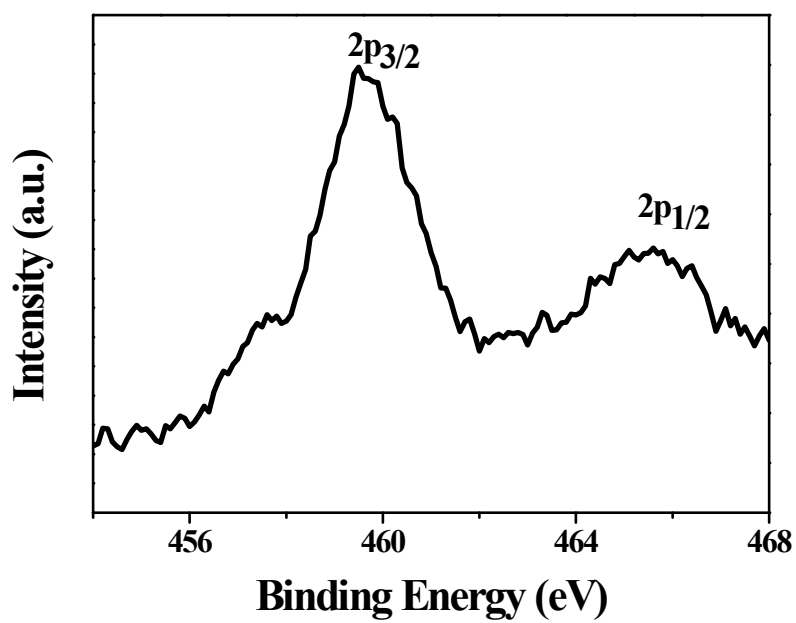

Fig S1 XPS spectrum of the Ti 2p line

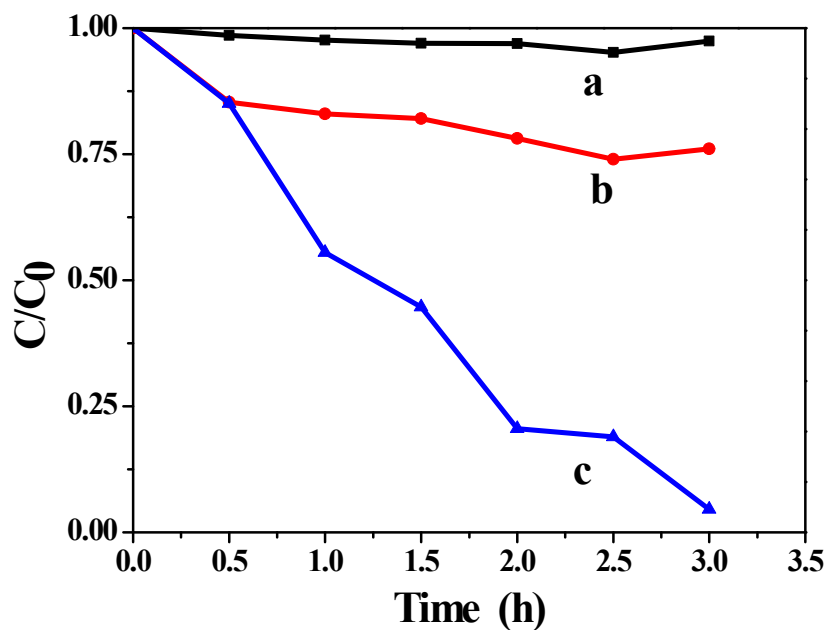

Fig.S2 Degradation of BPA under different conditions (a) blank; (b) adsorption; (c) by GO-ZnTi-MMO-2% under simulated solar light irradiation

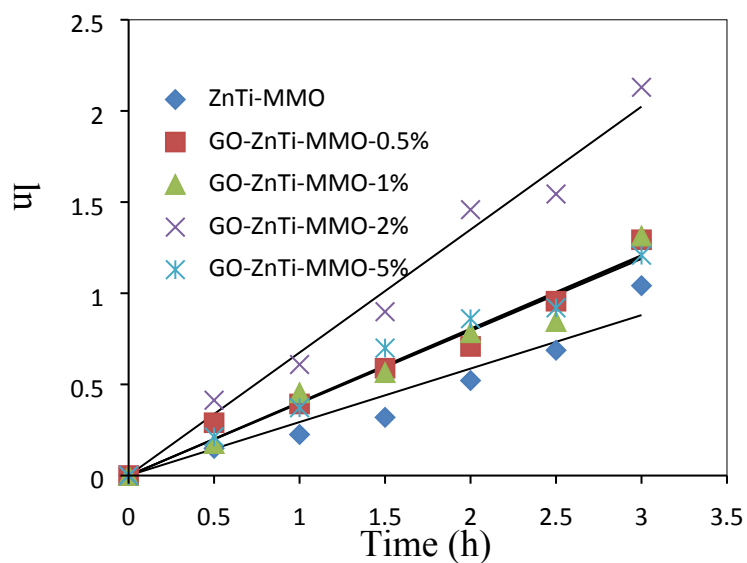

Fig S3 Pseudo first-order kinetics degradation for BPA by Langmuir-Hinshelwood model

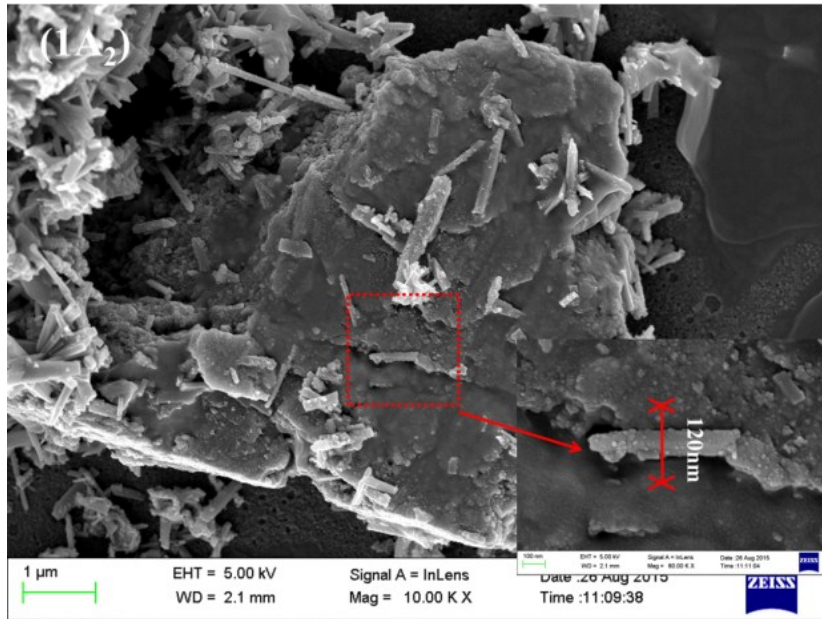

Fig.S4 SEM of GO-ZnTi-MMO-2%
